# Supplementary material for: Molecular and Morphological Characterization of Introgression Lines with Resistance to Bacterial Leaf Blight and Blast in Rice
Source: MDPI journal article supplement (doi:10.3390/plants12163012), 2023-08-21
Supplement: s1 [file s1]

**Supplementary Table S1. Mean phenotypic performance of the yield traits in 46 rice genotypes during *kharif* 2020**

| S. No     | Entry      | DFF        | PH        | PL           | TN        | PN        | GN         | TW           | PY         |
|-----------|------------|------------|-----------|--------------|-----------|-----------|------------|--------------|------------|
| 1         | 19247      | 103        | 85        | 22.05        | 10        | 8         | 91         | 21.00        | 367        |
| 2         | 19013      | 89         | 86        | 22.20        | 10        | 12        | 81         | 25.25        | 363        |
| 3         | 19021      | 102        | 89        | 20.05        | 17        | 13        | 53         | 24.90        | 451        |
| 4         | 19022      | 101        | 89        | 19.40        | 21        | 21        | 92         | 25.65        | 581        |
| 5         | 19023      | 99         | 93        | 32.50        | 14        | 10        | 103        | 23.00        | 472        |
| 6         | 19024      | 99         | 88        | 21.75        | 16        | 14        | 83         | 22.75        | 504        |
| 7         | 19026      | 101        | 81        | 28.20        | 16        | 15        | 76         | 21.45        | 463        |
| 8         | 19180      | 110        | 98        | 24.50        | 10        | 10        | 93         | 27.95        | 430        |
| 9         | 19181      | 101        | 97        | 26.95        | 11        | 9         | 110        | 28.25        | 389        |
| 10        | 19182      | 109        | 85        | 25.65        | 19        | 16        | 118        | 24.60        | 444        |
| 11        | 19185      | 97         | 87        | 23.05        | 14        | 12        | 75         | 24.25        | 515        |
| 12        | 19206      | 98         | 92        | 21.60        | 11        | 12        | 55         | 24.80        | 399        |
| 13        | 19211      | 94         | 84        | 22.95        | 16        | 11        | 67         | 22.35        | 422        |
| 14        | 19396      | 97         | 84        | 22.15        | 16        | 12        | 92         | 23.95        | 608        |
| 15        | 19408      | 102        | 96        | 26.75        | 12        | 11        | 145        | 28.65        | 398        |
| 16        | 19411      | 98         | 79        | 22.85        | 16        | 11        | 99         | 23.00        | 447        |
| 17        | 19420      | 91         | 94        | 24.50        | 14        | 12        | 87         | 27.60        | 314        |
| 18        | 19461      | 101        | 95        | 27.65        | 13        | 10        | 133        | 29.45        | 341        |
| 19        | 19019      | 101        | 85        | 21.70        | 20        | 10        | 78         | 23.20        | 361        |
| 20        | 19020      | 102        | 89        | 20.30        | 26        | 20        | 67         | 24.45        | 476        |
| 21        | 19025      | 99         | 90        | 21.85        | 21        | 19        | 84         | 21.65        | 432        |
| 22        | 19030      | 101        | 93        | 21.50        | 10        | 9         | 159        | 21.45        | 756        |
| <b>23</b> | <b>RP1</b> | <b>98</b>  | <b>84</b> | <b>21.15</b> | <b>16</b> | <b>15</b> | <b>105</b> | <b>24.70</b> | <b>473</b> |
| 24        | 19284      | 99         | 79        | 18.45        | 15        | 12        | 65         | 27.05        | 466        |
| 25        | 19345      | 119        | 88        | 32.00        | 10        | 8         | 163        | 14.90        | 308        |
| 26        | 19346      | 114        | 87        | 19.95        | 13        | 10        | 104        | 11.90        | 323        |
| 27        | 19484      | 101        | 98        | 22.85        | 10        | 9         | 96         | 16.15        | 426        |
| 28        | 19485      | 106        | 98        | 21.10        | 12        | 10        | 93         | 14.75        | 457        |
| 29        | 19128      | 103        | 79        | 24.00        | 11        | 7         | 241        | 20.95        | 299        |
| 30        | 19353      | 102        | 113       | 23.55        | 10        | 9         | 163        | 26.40        | 250        |
| 31        | 19072      | 108        | 104       | 25.30        | 13        | 11        | 161        | 12.15        | 542        |
| 32        | 19103      | 102        | 99        | 20.95        | 17        | 13        | 102        | 23.65        | 515        |
| 33        | 19144      | 106        | 87        | 18.80        | 14        | 12        | 152        | 16.20        | 414        |
| 34        | 19162      | 109        | 84        | 19.25        | 8         | 7         | 86         | 23.85        | 369        |
| 35        | 19283      | 101        | 79        | 16.45        | 13        | 13        | 111        | 23.15        | 358        |
| 36        | 19344      | 119        | 85        | 21.00        | 13        | 12        | 114        | 26.95        | 391        |
| 37        | 19347      | 119        | 93        | 20.20        | 10        | 6         | 132        | 15.90        | 440        |
| 38        | 19429      | 102        | 98        | 21.05        | 11        | 9         | 111        | 15.20        | 385        |
| 39        | 19447      | 97         | 89        | 21.65        | 11        | 9         | 86         | 19.65        | 382        |
| 40        | 19448      | 94         | 98        | 22.65        | 12        | 6         | 122        | 20.00        | 372        |
| 41        | 19483      | 102        | 109       | 21.40        | 11        | 10        | 175        | 17.15        | 520        |
| 42        | 19487      | 101        | 99        | 20.95        | 15        | 15        | 143        | 15.30        | 447        |
| <b>43</b> | <b>RP2</b> | <b>111</b> | <b>95</b> | <b>23.50</b> | <b>10</b> | <b>9</b>  | <b>114</b> | <b>16.75</b> | <b>427</b> |
| 44        | C1         | 106        | 81        | 20.40        | 12        | 8         | 149        | 12.25        | 404        |
| 45        | C2         | 111        | 77        | 21.55        | 14        | 6         | 148        | 14.60        | 690        |
| 46        | C3         | 118        | 86        | 22.75        | 20        | 19        | 133        | 17.05        | 585        |
|           | Mean       | 103        | 90        | 23           | 12        | 12        | 111        | 21           | 439        |
|           | Minimum    | 89         | 77        | 16.45        | 6         | 6         | 53         | 11.90        | 250        |
|           | Maximum    | 119        | 113       | 32.50        | 21        | 26        | 241        | 29.45        | 756        |
|           | Variance   | 49.03      | 50.52     | 6.55         | 3.78      | 7.81      | 877.29     | 21.08        | 7373.76    |
|           | SD         | 7          | 7.11      | 2.56         | 1.94      | 2.79      | 29.62      | 4.59         | 85.87      |
|           | SE         | 1.03       | 1.05      | 0.38         | 0.29      | 0.41      | 4.37       | 0.68         | 12.66      |

| S. No | Entry | DFF  | PH   | PL    | TN    | PN    | GN    | TW    | PY    |
|-------|-------|------|------|-------|-------|-------|-------|-------|-------|
|       | CV%   | 6.79 | 7.91 | 11.35 | 15.63 | 22.65 | 26.63 | 21.43 | 19.57 |

DFF-Days to Fifty Percent Flowering, PH- Plant Height, PL- Panicle Length, TN-Tiller Number, PN-Panicle Number, GN- Grain Number, TW-Thousand grain weight, PY- Plot yield/ grain yield, SD- Standard Deviation, SE- Standard Error, CV% - Coefficient of Variation, RP1-Krishna Hamsa, RP2-WGL14, C1-Improved Samba Mashuri, C2-Samba Mahsuri, C3-Swarna.

**Supplementary Table S2. Mean phenotypic values of yield traits in 46 rice genotypes during rabi 2021**

| S.No      | Entry      | DFF        | PH (cm)   | PL (cm)      | TN        | PN        | GN         | TW (g)       | PY (g/m <sup>2</sup> ) |
|-----------|------------|------------|-----------|--------------|-----------|-----------|------------|--------------|------------------------|
| 1         | 19247      | 129        | 80        | 21.86        | 13        | 12        | 91         | 19.56        | 805                    |
| 2         | 19013      | 107        | 79        | 22.20        | 19        | 16        | 79         | 21.23        | 473                    |
| 3         | 19021      | 117        | 76        | 21.19        | 17        | 17        | 97         | 20.41        | 803                    |
| 4         | 19022      | 117        | 76        | 21.18        | 15        | 15        | 106        | 20.68        | 960                    |
| 5         | 19023      | 112        | 78        | 21.80        | 17        | 17        | 120        | 21.20        | 896                    |
| 6         | 19024      | 117        | 78        | 21.56        | 18        | 16        | 94         | 20.91        | 836                    |
| 7         | 19026      | 101        | 74        | 21.25        | 19        | 17        | 90         | 20.91        | 671                    |
| 8         | 19180      | 111        | 92        | 25.94        | 18        | 17        | 125        | 22.16        | 837                    |
| 9         | 19181      | 111        | 89        | 26.48        | 17        | 16        | 113        | 25.23        | 797                    |
| 10        | 19182      | 120        | 86        | 24.41        | 17        | 16        | 145        | 21.85        | 1018                   |
| 11        | 19185      | 113        | 80        | 21.61        | 14        | 12        | 95         | 22.49        | 501                    |
| 12        | 19206      | 108        | 76        | 22.04        | 17        | 14        | 86         | 19.83        | 417                    |
| 13        | 19211      | 108        | 79        | 23.53        | 16        | 13        | 109        | 19.21        | 509                    |
| 14        | 19396      | 112        | 79        | 20.68        | 18        | 18        | 66         | 21.20        | 687                    |
| 15        | 19408      | 119        | 91        | 25.59        | 16        | 14        | 119        | 25.63        | 816                    |
| 16        | 19411      | 114        | 82        | 22.50        | 16        | 15        | 93         | 21.16        | 663                    |
| 17        | 19420      | 108        | 92        | 26.11        | 17        | 15        | 130        | 25.46        | 509                    |
| 18        | 19461      | 128        | 96        | 24.75        | 17        | 15        | 125        | 19.70        | 734                    |
| 19        | 19019      | 113        | 75        | 22.28        | 16        | 16        | 101        | 21.26        | 580                    |
| 20        | 19020      | 116        | 79        | 22.35        | 19        | 18        | 116        | 20.65        | 780                    |
| 21        | 19025      | 113        | 71        | 21.30        | 21        | 19        | 88         | 21.18        | 611                    |
| 22        | 19030      | 110        | 89        | 21.28        | 18        | 17        | 136        | 18.90        | 744                    |
| <b>23</b> | <b>RP1</b> | <b>105</b> | <b>77</b> | <b>21.39</b> | <b>16</b> | <b>14</b> | <b>96</b>  | <b>20.03</b> | <b>474</b>             |
| 24        | 19284      | 112        | 76        | 18.03        | 14        | 18        | 87         | 14.50        | 417                    |
| 25        | 19345      | 128        | 90        | 22.43        | 14        | 13        | 145        | 13.15        | 471                    |
| 26        | 19346      | 100        | 91        | 22.34        | 15        | 13        | 182        | 11.51        | 621                    |
| 27        | 19484      | 128        | 88        | 21.78        | 19        | 14        | 159        | 14.88        | 905                    |
| 28        | 19485      | 128        | 94        | 21.73        | 18        | 15        | 154        | 11.78        | 700                    |
| 29        | 19128      | 128        | 85        | 20.74        | 14        | 14        | 83         | 19.63        | 720                    |
| 30        | 19353      | 135        | 103       | 21.99        | 15        | 12        | 103        | 18.10        | 548                    |
| 31        | 19072      | 112        | 97        | 27.18        | 14        | 14        | 177        | 12.71        | 410                    |
| 32        | 19103      | 126        | 87        | 20.98        | 17        | 13        | 58         | 15.44        | 487                    |
| 33        | 19144      | 126        | 98        | 20.78        | 18        | 16        | 128        | 18.56        | 619                    |
| 34        | 19162      | 128        | 86        | 21.75        | 14        | 13        | 169        | 29.05        | 411                    |
| 35        | 19283      | 105        | 73        | 18.98        | 18        | 15        | 90         | 12.85        | 434                    |
| 36        | 19344      | 128        | 87        | 22.61        | 13        | 12        | 155        | 13.18        | 386                    |
| 37        | 19347      | 134        | 92        | 23.05        | 14        | 13        | 114        | 12.54        | 271                    |
| 38        | 19429      | 135        | 96        | 20.79        | 16        | 16        | 103        | 14.93        | 441                    |
| 39        | 19447      | 103        | 90        | 20.24        | 17        | 12        | 92         | 18.86        | 323                    |
| 40        | 19448      | 126        | 86        | 20.75        | 26        | 19        | 74         | 18.59        | 541                    |
| 41        | 19483      | 100        | 97        | 20.08        | 16        | 14        | 97         | 14.64        | 710                    |
| 42        | 19487      | 110        | 93        | 20.26        | 18        | 17        | 133        | 14.03        | 704                    |
| <b>43</b> | <b>RP2</b> | <b>129</b> | <b>92</b> | <b>23.66</b> | <b>13</b> | <b>12</b> | <b>149</b> | <b>12.23</b> | <b>490</b>             |
| 44        | C1         | 111        | 72        | 19.65        | 21        | 14        | 107        | 13.96        | 436                    |
| 45        | C2         | 115        | 79        | 20.39        | 18        | 16        | 137        | 14.36        | 566                    |
| 46        | C3         | 133        | 87        | 23.19        | 18        | 16        | 129        | 16.71        | 721                    |

| S.No | Entry    | DFF    | PH (cm) | PL (cm) | TN   | PN    | GN     | TW (g) | PY (g/m <sup>2</sup> ) |
|------|----------|--------|---------|---------|------|-------|--------|--------|------------------------|
|      | Mean     | 117    | 85      | 22      | 16   | 16    | 114    | 18     | 609                    |
|      | Minimum  | 100    | 71      | 18.03   | 12   | 12    | 58     | 11.51  | 49                     |
|      | Maximum  | 135    | 103     | 27.18   | 26   | 21    | 182    | 29.05  | 1081                   |
|      | Variance | 102.49 | 51.19   | 2.88    | 1.93 | 2.96  | 550.88 | 16.06  | 29380                  |
|      | SD       | 10.12  | 7.15    | 1.7     | 1.39 | 1.72  | 23.47  | 4.01   | 171.41                 |
|      | SE       | 1.49   | 1.05    | 0.25    | 0.21 | 0.25  | 3.46   | 0.59   | 25.27                  |
|      | CV%      | 8.64   | 8.4     | 7.65    | 8.77 | 10.93 | 20.67  | 21.74  | 28.17                  |

DFF-Days to Fifty Percent Flowering, PH- Plant Height, PL- Panicle Length, TN-Tiller Number, PN-Panicle Number, GN- Grain Number, TW-Thousand grain weight, PY- Plot yield/ grain yield, SD- Standard Deviation, SE- Standard Error, CV% - Coefficient of Variation, RP1-Krishna Hamsa, RP2-WGL14, C1-Improved Samba Mashuri, C2-Samba Mahsuri, C3-Swarna.

**Supplementary Table S3. Pooled Mean phenotypic values of the yield traits in 46 rice genotypes**

| S. No     | Entry      | DFF        | PH (cm)   | PL (cm)      | TN        | PN       | GN         | TW (g)       | PY (g/m <sup>2</sup> ) |
|-----------|------------|------------|-----------|--------------|-----------|----------|------------|--------------|------------------------|
| 1         | 19247      | 116        | 83        | 21.96        | 11        | 10       | 91         | 20.28        | 586                    |
| 2         | 19013      | 98         | 82        | 22.20        | 15        | 14       | 80         | 23.24        | 418                    |
| 3         | 19021      | 110        | 83        | 20.62        | 17        | 15       | 75         | 22.66        | 627                    |
| 4         | 19022      | 109        | 83        | 20.29        | 18        | 18       | 99         | 23.16        | 771                    |
| 5         | 19023      | 106        | 85        | 27.15        | 15        | 14       | 111        | 22.10        | 684                    |
| 6         | 19024      | 108        | 83        | 21.66        | 16        | 16       | 88         | 21.83        | 670                    |
| 7         | 19026      | 101        | 78        | 24.73        | 17        | 16       | 83         | 21.18        | 567                    |
| 8         | 19180      | 111        | 95        | 25.22        | 14        | 13       | 109        | 25.06        | 633                    |
| 9         | 19181      | 106        | 93        | 26.71        | 14        | 13       | 111        | 26.74        | 593                    |
| 10        | 19182      | 115        | 85        | 25.03        | 17        | 17       | 131        | 23.23        | 731                    |
| 11        | 19185      | 105        | 83        | 22.33        | 14        | 12       | 85         | 23.37        | 508                    |
| 12        | 19206      | 103        | 84        | 21.82        | 14        | 13       | 70         | 22.32        | 408                    |
| 13        | 19211      | 101        | 81        | 23.24        | 14        | 14       | 88         | 20.78        | 466                    |
| 14        | 19396      | 105        | 81        | 21.41        | 17        | 15       | 79         | 22.58        | 647                    |
| 15        | 19408      | 111        | 93        | 26.17        | 14        | 12       | 132        | 27.14        | 607                    |
| 16        | 19411      | 106        | 81        | 22.68        | 15        | 13       | 96         | 22.08        | 555                    |
| 17        | 19420      | 100        | 93        | 25.31        | 16        | 13       | 108        | 26.53        | 411                    |
| 18        | 19461      | 115        | 95        | 26.20        | 15        | 12       | 129        | 24.58        | 537                    |
| 19        | 19019      | 107        | 80        | 21.99        | 18        | 13       | 89         | 22.23        | 470                    |
| 20        | 19020      | 109        | 84        | 21.33        | 23        | 19       | 92         | 22.55        | 628                    |
| 21        | 19025      | 106        | 80        | 21.58        | 20        | 20       | 86         | 21.41        | 521                    |
| 22        | 19030      | 106        | 91        | 21.39        | 14        | 13       | 147        | 20.18        | 750                    |
| <b>23</b> | <b>RP1</b> | <b>102</b> | <b>80</b> | <b>21.27</b> | <b>15</b> | <b>5</b> | <b>101</b> | <b>22.36</b> | <b>474</b>             |
| 24        | 19284      | 106        | 77        | 18.24        | 15        | 14       | 76         | 20.78        | 441                    |
| 25        | 19345      | 124        | 89        | 27.21        | 11        | 11       | 154        | 14.03        | 390                    |
| 26        | 19346      | 107        | 89        | 21.14        | 13        | 12       | 143        | 11.71        | 472                    |
| 27        | 19484      | 115        | 93        | 22.31        | 14        | 12       | 127        | 15.51        | 666                    |
| 28        | 19485      | 117        | 96        | 21.41        | 14        | 14       | 123        | 13.26        | 579                    |
| 29        | 19128      | 116        | 82        | 22.37        | 12        | 10       | 162        | 20.29        | 509                    |
| 30        | 19353      | 119        | 108       | 22.77        | 12        | 11       | 133        | 22.25        | 399                    |
| 31        | 19072      | 110        | 100       | 26.24        | 13        | 12       | 169        | 12.43        | 476                    |
| 32        | 19103      | 114        | 93        | 20.96        | 17        | 13       | 80         | 19.54        | 501                    |
| 33        | 19144      | 116        | 93        | 19.79        | 15        | 15       | 140        | 17.38        | 516                    |
| 34        | 19162      | 119        | 85        | 20.50        | 11        | 10       | 128        | 26.45        | 390                    |
| 35        | 19283      | 103        | 76        | 17.71        | 16        | 14       | 101        | 18.00        | 396                    |
| 36        | 19344      | 124        | 86        | 21.81        | 12        | 12       | 135        | 20.06        | 388                    |
| 37        | 19347      | 127        | 92        | 21.63        | 11        | 10       | 123        | 14.22        | 355                    |
| 38        | 19429      | 119        | 97        | 20.92        | 13        | 13       | 107        | 15.06        | 413                    |
| 39        | 19447      | 100        | 90        | 20.94        | 13        | 11       | 89         | 19.26        | 353                    |
| 40        | 19448      | 110        | 92        | 21.70        | 16        | 15       | 98         | 19.29        | 456                    |

| S. No     | Entry      | DFP        | PH (cm)   | PL (cm)      | TN        | PN        | GN         | TW (g)       | PY (g/m <sup>2</sup> ) |
|-----------|------------|------------|-----------|--------------|-----------|-----------|------------|--------------|------------------------|
| 41        | 19483      | 101        | 103       | 20.74        | 13        | 12        | 136        | 15.89        | 615                    |
| 42        | 19487      | 106        | 96        | 20.61        | 16        | 16        | 138        | 14.66        | 576                    |
| <b>43</b> | <b>RP2</b> | <b>120</b> | <b>94</b> | <b>23.58</b> | <b>11</b> | <b>10</b> | <b>131</b> | <b>14.49</b> | <b>455</b>             |
| 44        | C1         | 109        | 77        | 20.03        | 14        | 13        | 128        | 13.11        | 420                    |
| 45        | C2         | 113        | 78        | 20.97        | 15        | 12        | 142        | 14.48        | 628                    |
| 46        | C3         | 126        | 86        | 22.97        | 19        | 18        | 131        | 16.88        | 653                    |
|           | Mean       | 110        | 88        | 22           | 14        | 14        | 112        | 20           | 524                    |
|           | Minimum    | 98         | 76        | 17.71        | 11        | 10        | 70         | 11.71        | 238                    |
|           | Maximum    | 127        | 108       | 27.21        | 23        | 20        | 169        | 27.14        | 771                    |
|           | Variance   | 125        | 56        | 5            | 6         | 8         | 708        | 20.64        | 25446                  |
|           | SD         | 11.17      | 7.48      | 2.17         | 2.4       | 2.87      | 26.6       | 4.54         | 159.52                 |
|           | SE         | 1.16       | 0.78      | 0.23         | 0.25      | 0.3       | 2.77       | 0.47         | 16.63                  |
|           | CV%        | 10.14      | 8.55      | 9.69         | 17        | 20.45     | 23.67      | 22.8         | 30.46                  |

DFP-Days to Fifty Percent Flowering, PH- Plant Height, PL- Panicle Length, TN-Tiller Number, PN-Panicle Number, GN- Grain Number, TW-Thousand grain weight, PY- Plot yield/ grain yield, SD- Standard Deviation, SE- Standard Error, CV% - Coefficient of Variation, RP1-Krishna Hamsa, RP2-WGL14, C1-Improved Samba Mashuri, C2-Samba Mahsuri, C3-Swarna.

**Supplementary Table S4. List of BB and BL gene specific primers used for molecular characterization**

|      |               |                                |
|------|---------------|--------------------------------|
| Xa21 | PTA248F       | AGACGCGGAAGGGTGGTCCCGGA        |
|      | PTA248R       | AGACGCGGTAATCGAAAGATGAAA       |
| Xa33 | WRRM7.1F      | TTTTATCCCCTTCTTCCTTC           |
|      | WRRM7.1R      | CGTGTTTGTGTGCTTTTG             |
|      | WRRM7.6F      | CAACAAACACCTCCATGGTC           |
|      | WRRM7.6R      | GGGAATGAGCAAAATGG              |
| xa13 | xa13ProF      | GGCCATGGCTCAGTGTTTAT           |
|      | xa13ProR      | GAGCTCCAGCTCTCCAAATG           |
| xa5  | xa5RF         | AGCTCGCCATTCAAGTTCTTGAG        |
|      | xa5SRR        | TGACTTGGTTCTCCAAGGCTT          |
|      | xa5SF         | GTCTGGAATTTGCTCGCGTTCCG        |
|      | xa5SR         | TGGTAAAGTAGATACCTTATCAAACCTGGA |
| Xa38 | Oso4g53050-1F | TCTTCTATTGCTAACATTGGTG         |
|      | Oso4g53050-1R | TCGATTTCATTTTCAGAG             |
| xa23 | Lj74-F        | AAGCCATTTGATGAGCAACC           |
|      | Lj74-R        | GGATCCATTTTCAGCATAACCTT        |
| Xa4  | RM224F        | TCTCCCTCCTCCTCCTCCTACG         |
|      | RM224R        | TGGTATAAAAGGCATTCGGG           |
| xa8  | RM21044F      | GCAACTCGACGGAAGGCATCG          |
|      | RM21044R      | GAGGGCTCAAGACGAACTCATCACG      |
|      | RM214F        | CTGATGATAGAAACCTCTTCTC         |
|      | RM214R        | AAGAACAGCTGACTTCACAA           |
| Xa27 | BDTG 19F      | GAAGCCACACACTGAGACA            |
|      | BDTG 19R      | CGGAGGAGAACTAGAGAGACCA         |
|      | M1081F        | TAGCTAAATAAAAGCAATTTTACGA      |
|      | M1081R        | GCCCTTACATATCGATGTTTATTG       |
| Xa41 | pSWEET14F     | ATTGGCACTTTCTGTCATGC           |
|      | pSWEET14R     | GAGACCAAAGGCGAAGGCCCA          |
| Pi1  | RM224 F       | CTCGATCGATCTTCACGAGG           |
|      | RM224 R       | TGCTATAAAAGGCATTCGGG           |
| Pi2  | 195-1 F       | ATGGTCCTTTATCTTTATTG           |
|      | 195-1 R       | TTGCTCCATCTCCTCTGTT            |
| Pi9  | Nmsmp19 F     | CGAGAAGGACATCTGGTACG           |
|      | Nmsmp19 R     | GAGATGCTTGGTTTAGAAGAC          |
| Pi20 | RM1337 F      | GCTGAGGAGTATCCTTTCTC           |

|             |           |                            |
|-------------|-----------|----------------------------|
|             | RM1337 R  | ACCATAGGAAGATCATCACA       |
|             | RM5364 F  | GTATTACGCTCGATAGCGGC       |
|             | RM5364 R  | GTATCCTTTCTCGCAATCGC       |
| <i>Pi38</i> | RM21F     | ACAGTATTCCGTAGGCACGG       |
|             | RM21 R    | GCTCCATGAGGGTGGTAGAG       |
| <i>Pi54</i> | RM206 F   | CCCATGCGTTTAACTATTCT       |
|             | RM206 R   | CGTTCCATCGATCCGTATGG       |
|             | RM224 F   | CTCGATCGATCTTCACGAGG       |
|             | RM224 R   | TGCTATAAAAGGCATTCCGGG      |
|             | PikhMAS F | CAATCTCCAAAGTTTTTCAGG      |
|             | PikhMAS R | GCTTCAATCACTGCTAGACC       |
| <i>Pib</i>  | RM166 F   | GGTCCTGGGTCAATAATTGGGTTACC |
|             | RM166 R   | TTGCTGCATGATCCTAAACCGG     |
|             | RM208 F   | TCTGCAAGCCTTGTCTGATG       |
|             | RM208 R   | TAAGTCGATCATTGTGTGGACC     |
| <i>Pitp</i> | RM246 F   | GAGCTCCATCAGCCATTGAG       |
|             | RM246 R   | CTGAGTGCTGCTGCGACT         |
| <i>Pizt</i> | Zt56591 F | TTGCTGAGCCATTGTTAAACA      |
|             | Zt56591 R | ATCTCTTCATATATATGAAGGCCAC  |
| <i>Pi40</i> | pi40 F    | CAACAAACGGGTCGACAAAGG      |
|             | pi40 R    | CCCCCAGGTCGTGATACCTTC      |
